# Supplementary material for: Neighborhood Properties Are Important Determinants of Temperature Sensitive Mutations
Source: PubMed Central journal article supplement (PMC3229608; doi:10.1371/journal.pone.0028507), 2011-12-02
Supplement: pone.0028507.s001.pdf [file pone.0028507.s001.pdf]

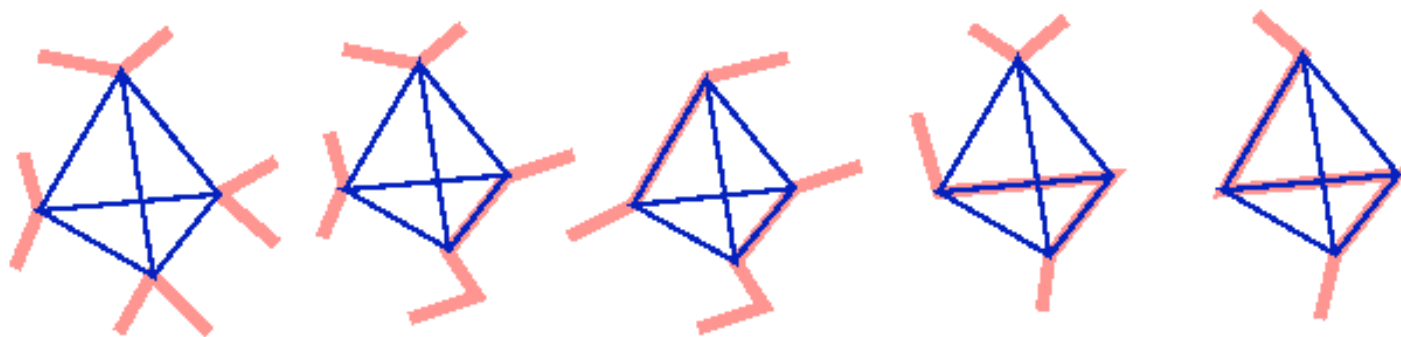

**Figure S1 - Five types of Delaunay tetrahedra based on backbone chain connectivity in three dimensions**

Blue lines are edges in Delaunay tetrahedra and red lines are the protein backbone.
