# Supplementary material for: Neighborhood Properties Are Important Determinants of Temperature Sensitive Mutations
Source: PubMed Central journal article supplement (PMC3229608; doi:10.1371/journal.pone.0028507), 2011-12-02
Supplement: pone.0028507.s003.pdf [file pone.0028507.s003.pdf]

**Table S2 - The performance of 133 features**

| Feature                                                             | Feature evaluation* |       |      |      |      |
|---------------------------------------------------------------------|---------------------|-------|------|------|------|
|                                                                     | ACC                 | MCC   | AUC  | KL   | DD   |
| <b>Mutation site, sequence features</b>                             |                     |       |      |      |      |
| EntropySub                                                          | 0.73                | 0.32  | 0.76 | 0.21 | 0.30 |
| EntropySuper                                                        | 0.59                | 0.16  | 0.66 | 0.47 | 0.08 |
| RelEntropySub                                                       | 0.70                | 0.24  | 0.73 | 0.24 | 0.18 |
| RelEntropySuper                                                     | 0.59                | 0.16  | 0.66 | 0.48 | 0.07 |
| PHC                                                                 | 0.68                | 0.22  | 0.71 | 0.26 | 0.13 |
| HydrophobWT                                                         | 0.60                | 0.11  | 0.60 | 0.39 | 0.03 |
| HydrophobMut                                                        | 0.54                | 0.07  | 0.55 | 0.57 | 0.01 |
| HydrophobDiff                                                       | 0.59                | 0.10  | 0.61 | 0.42 | 0.04 |
| VolumeDiff                                                          | 0.54                | 0.05  | 0.55 | 0.52 | 0.01 |
| ChargeDiff                                                          | 0.41                | 0.01  | 0.51 | 1.02 | 0.00 |
| Grantham                                                            | 0.52                | 0.01  | 0.50 | 0.57 | 0.00 |
| Unusual                                                             | 0.82                | 0.04  | 0.48 | 0.01 | 0.00 |
| NonPolarWT                                                          | 0.54                | 0.13  | 0.58 | 0.63 | 0.04 |
| PolarWT                                                             | 0.33                | 0.09  | 0.52 | 1.57 | 0.02 |
| ChargedWT                                                           | 0.33                | 0.06  | 0.51 | 1.50 | 0.01 |
| NonPolarMut                                                         | 0.52                | -0.04 | 0.45 | 0.50 | 0.00 |
| PolarMut                                                            | 0.48                | -0.02 | 0.48 | 0.68 | 0.00 |
| ChargedMut                                                          | 0.56                | -0.02 | 0.48 | 0.41 | 0.00 |
| NonPolar2Charged                                                    | 0.80                | 0.09  | 0.52 | 0.00 | 0.02 |
| NonPolar2Polar                                                      | 0.78                | 0.04  | 0.48 | 0.00 | 0.00 |
| NonPolar2NonPolar                                                   | 0.72                | 0.05  | 0.51 | 0.07 | 0.00 |
| Polar2Charged                                                       | 0.19                | 0.06  | 0.49 | 2.48 | 0.01 |
| Polar2Polar                                                         | 0.17                | 0.04  | 0.48 | 2.60 | 0.01 |
| Polar2NonPolar                                                      | 0.22                | 0.04  | 0.49 | 2.22 | 0.01 |
| Charged2Charged                                                     | 0.18                | 0.04  | 0.47 | 2.53 | 0.00 |
| Charged2Polar                                                       | 0.24                | -0.01 | 0.47 | 1.98 | 0.00 |
| Charged2NonPolar                                                    | 0.22                | 0.03  | 0.50 | 2.14 | 0.00 |
| DisorderRegion                                                      | 0.50                | -0.02 | 0.47 | 0.60 | 0.00 |
| <b>Mutation site, structure features</b>                            |                     |       |      |      |      |
| SolvAccessWT                                                        | 0.58                | 0.19  | 0.70 | 0.53 | 0.11 |
| SolvAccessMut                                                       | 0.55                | 0.16  | 0.67 | 0.63 | 0.09 |
| SolvAccessDiff                                                      | 0.50                | 0.02  | 0.51 | 0.65 | 0.00 |
| RelSolvAccessWT                                                     | 0.61                | 0.19  | 0.71 | 0.44 | 0.12 |
| RelSolvAccessMut                                                    | 0.55                | 0.16  | 0.67 | 0.63 | 0.09 |
| RelSolvAccessDiff                                                   | 0.50                | -0.01 | 0.51 | 0.62 | 0.00 |
| BuryWT                                                              | 0.87                | 0.08  | 0.48 | 0.10 | 0.01 |
| BuryMut                                                             | 0.83                | 0.11  | 0.52 | 0.00 | 0.02 |
| IsLigand                                                            | 0.20                | 0.02  | 0.48 | 2.33 | 0.00 |
| InStruct                                                            | 0.71                | -0.01 | 0.48 | 0.05 | 0.00 |
| HelixBreaker                                                        | 0.20                | -0.03 | 0.47 | 2.23 | 0.01 |
| TurnBreaker                                                         | 0.57                | -0.03 | 0.47 | 0.37 | 0.00 |
| Bfactor                                                             | 0.57                | 0.16  | 0.69 | 0.55 | 0.13 |
| normBfactor                                                         | 0.57                | 0.16  | 0.69 | 0.55 | 0.11 |
| sBfactor                                                            | 0.62                | 0.20  | 0.70 | 0.44 | 0.17 |
| snormBfactor                                                        | 0.62                | 0.20  | 0.70 | 0.43 | 0.15 |
| ddGPoPMuSiC                                                         | 0.68                | 0.18  | 0.67 | 0.22 | 0.10 |
| ddGratioFoldX                                                       | 0.77                | 0.16  | 0.65 | 0.04 | 0.08 |
| <b>Neighborhood defined by sequence distance, sequence features</b> |                     |       |      |      |      |
| AA20D                                                               | 0.67                | 0.22  | 0.72 | 0.29 | 0.17 |
| EntropySubAA                                                        | 0.68                | 0.25  | 0.74 | 0.30 | 0.26 |
| EntropySuperAA                                                      | 0.48                | 0.11  | 0.56 | 0.83 | 0.05 |
| RelEntropySubAA                                                     | 0.67                | 0.25  | 0.73 | 0.31 | 0.23 |
| RelEntropySuperAA                                                   | 0.48                | 0.12  | 0.56 | 0.84 | 0.05 |
| HydroAvgWT                                                          | 0.56                | 0.10  | 0.59 | 0.52 | 0.02 |

|              |      |       |      |      |      |
|--------------|------|-------|------|------|------|
| HydroAvgMut  | 0.51 | 0.03  | 0.52 | 0.61 | 0.00 |
| HydroAvgDiff | 0.59 | 0.11  | 0.61 | 0.41 | 0.04 |
| NonPolarAA   | 0.55 | 0.07  | 0.59 | 0.52 | 0.03 |
| PolarAA      | 0.57 | 0.07  | 0.55 | 0.46 | 0.01 |
| ChargedAA    | 0.57 | 0.06  | 0.54 | 0.46 | 0.01 |
| NPCAA        | 0.63 | 0.11  | 0.61 | 0.30 | 0.04 |
| PosAA        | 0.49 | 0.02  | 0.53 | 0.68 | 0.00 |
| NegAA        | 0.56 | 0.04  | 0.51 | 0.45 | 0.00 |
| NetChargeAA  | 0.50 | -0.04 | 0.48 | 0.56 | 0.00 |
| PNNA         | 0.54 | 0.06  | 0.54 | 0.53 | 0.01 |

**Neighborhood defined by sequence distance, structure features**

|                 |      |       |      |      |      |
|-----------------|------|-------|------|------|------|
| HydroMomentWT   | 0.55 | 0.02  | 0.52 | 0.46 | 0.00 |
| HydroMomentMut  | 0.49 | -0.04 | 0.46 | 0.60 | 0.00 |
| HydroMomentDiff | 0.69 | 0.10  | 0.59 | 0.14 | 0.03 |
| SolvAccessAA    | 0.56 | 0.05  | 0.58 | 0.48 | 0.05 |
| RelSolvAccessAA | 0.57 | 0.06  | 0.58 | 0.45 | 0.03 |
| BfactorAA       | 0.51 | 0.10  | 0.63 | 0.72 | 0.06 |
| normBfactorAA   | 0.51 | 0.10  | 0.63 | 0.71 | 0.06 |
| sBfactorAA      | 0.52 | 0.11  | 0.64 | 0.67 | 0.06 |
| snormBfactorAA  | 0.52 | 0.11  | 0.64 | 0.67 | 0.06 |
| AA2FT           | 0.71 | 0.05  | 0.57 | 0.08 | 0.14 |
| AA2Ligand       | 0.63 | 0.02  | 0.54 | 0.23 | 0.15 |
| AA2FTLigand     | 0.63 | 0.04  | 0.55 | 0.24 | 0.12 |

**Neighborhood defined by Euclidean distance, structure features**

|                     |      |       |      |      |      |
|---------------------|------|-------|------|------|------|
| Eucl20D             | 0.75 | 0.32  | 0.79 | 0.17 | 0.32 |
| EuclContact         | 0.64 | 0.16  | 0.66 | 0.34 | 0.07 |
| EntropySubEucl      | 0.68 | 0.25  | 0.74 | 0.30 | 0.29 |
| EntropySuperEucl    | 0.50 | 0.14  | 0.57 | 0.81 | 0.07 |
| RelEntropySubEucl   | 0.69 | 0.26  | 0.74 | 0.27 | 0.26 |
| RelEntropySuperEucl | 0.50 | 0.13  | 0.57 | 0.81 | 0.07 |
| HydroAvgEucl        | 0.57 | 0.11  | 0.59 | 0.49 | 0.03 |
| HydroWTOverAvgEucl  | 0.60 | 0.10  | 0.58 | 0.38 | 0.02 |
| HydroMutoverAvgEucl | 0.54 | 0.07  | 0.57 | 0.57 | 0.02 |
| NonPolarEucl        | 0.64 | 0.15  | 0.64 | 0.32 | 0.06 |
| PolarEucl           | 0.57 | 0.03  | 0.54 | 0.42 | 0.00 |
| ChargedEucl         | 0.60 | 0.14  | 0.62 | 0.42 | 0.06 |
| NPCEucl             | 0.63 | 0.17  | 0.66 | 0.36 | 0.08 |
| PosEucl             | 0.65 | 0.15  | 0.62 | 0.29 | 0.08 |
| NegEucl             | 0.61 | 0.07  | 0.55 | 0.32 | 0.01 |
| NetChargeEucl       | 0.55 | 0.04  | 0.56 | 0.48 | 0.04 |
| PNNEucl             | 0.64 | 0.14  | 0.63 | 0.30 | 0.08 |
| SolvAccessEucl      | 0.49 | 0.03  | 0.51 | 0.70 | 0.00 |
| RelSolvAccessEucl   | 0.50 | 0.03  | 0.53 | 0.66 | 0.00 |
| BfactorEucl         | 0.52 | 0.11  | 0.67 | 0.68 | 0.10 |
| normBfactorEucl     | 0.52 | 0.11  | 0.67 | 0.68 | 0.10 |
| sBfactorEucl        | 0.52 | 0.12  | 0.68 | 0.68 | 0.11 |
| snormBfactorEucl    | 0.52 | 0.12  | 0.68 | 0.68 | 0.11 |
| Eucl2FT             | 0.66 | 0.10  | 0.58 | 0.23 | 0.15 |
| Eucl2Ligand         | 0.51 | -0.01 | 0.52 | 0.59 | 0.00 |
| Eucl2FTLigand       | 0.51 | 0.00  | 0.52 | 0.58 | 0.00 |
| Hbond_6A            | 0.59 | 0.07  | 0.59 | 0.39 | 0.13 |
| SaltBridge_6A       | 0.53 | -0.03 | 0.47 | 0.48 | 0.00 |
| Hbond_2layers       | 0.55 | 0.12  | 0.61 | 0.57 | 0.04 |
| SaltBridge_2layers  | 0.49 | -0.03 | 0.47 | 0.60 | 0.00 |

**Neighborhood defined by topological distance, structure features**

|       |      |      |      |      |      |
|-------|------|------|------|------|------|
| DT20D | 0.71 | 0.27 | 0.75 | 0.23 | 0.19 |
|-------|------|------|------|------|------|

|                   |      |       |      |      |      |
|-------------------|------|-------|------|------|------|
| DTContact         | 0.60 | 0.12  | 0.63 | 0.41 | 0.05 |
| EntropySubDT      | 0.68 | 0.26  | 0.75 | 0.31 | 0.27 |
| EntropySuperDT    | 0.53 | 0.13  | 0.60 | 0.68 | 0.06 |
| RelEntropySubDT   | 0.68 | 0.25  | 0.75 | 0.29 | 0.26 |
| RelEntropySuperDT | 0.51 | 0.13  | 0.59 | 0.73 | 0.05 |
| HydroAvgDT        | 0.63 | 0.17  | 0.66 | 0.35 | 0.08 |
| HydroWToverAvgDT  | 0.56 | 0.07  | 0.55 | 0.49 | 0.01 |
| HydroMutoverAvgDT | 0.53 | 0.09  | 0.60 | 0.60 | 0.02 |
| NonPolarDT        | 0.63 | 0.16  | 0.65 | 0.36 | 0.07 |
| PolarDT           | 0.56 | 0.04  | 0.56 | 0.46 | 0.01 |
| ChargedDT         | 0.51 | 0.01  | 0.51 | 0.61 | 0.00 |
| NPCDT             | 0.64 | 0.17  | 0.65 | 0.32 | 0.08 |
| PosDT             | 0.51 | -0.02 | 0.48 | 0.57 | 0.00 |
| NegDT             | 0.46 | 0.05  | 0.53 | 0.86 | 0.01 |
| NetChargeDT       | 0.53 | 0.01  | 0.52 | 0.53 | 0.00 |
| PNNDT             | 0.46 | 0.05  | 0.53 | 0.85 | 0.01 |
| SolvAccessDT      | 0.62 | 0.16  | 0.65 | 0.40 | 0.07 |
| RelSolvAccessDT   | 0.61 | 0.16  | 0.66 | 0.42 | 0.08 |
| BfactorDT         | 0.53 | 0.13  | 0.68 | 0.66 | 0.11 |
| normBfactorDT     | 0.53 | 0.13  | 0.68 | 0.67 | 0.11 |
| sBfactorDT        | 0.54 | 0.14  | 0.69 | 0.65 | 0.15 |
| snormBfactorDT    | 0.54 | 0.14  | 0.69 | 0.65 | 0.14 |
| DTcount           | 0.65 | 0.17  | 0.66 | 0.32 | 0.07 |
| DTcountType0      | 0.70 | 0.15  | 0.62 | 0.17 | 0.05 |
| DTcountType1      | 0.61 | 0.10  | 0.59 | 0.36 | 0.02 |
| DTcountType2      | 0.57 | 0.10  | 0.59 | 0.50 | 0.05 |
| DTcountType3      | 0.64 | 0.14  | 0.62 | 0.32 | 0.07 |
| DTcountType4      | 0.58 | 0.12  | 0.60 | 0.46 | 0.06 |

\* ACC = accuracy, MCC = Matthews correlation coefficient, AUC = area under the curve, KL = Kullback-Leibler divergence, DD = distribution distance. These values were calculated from a ten-fold cross-validation of each feature.
