# Supplementary material for: Neighborhood Properties Are Important Determinants of Temperature Sensitive Mutations
Source: PubMed Central journal article supplement (PMC3229608; doi:10.1371/journal.pone.0028507), 2011-12-02
Supplement: pone.0028507.s004.pdf [file pone.0028507.s004.pdf]

**Table S3 - The performance of disordered region, helix breaker, and turn breaker defined by alternative methods**

Performance is similar to those in Table S2.

| Feature                                                              | Feature evaluation* |       |      |      |      |
|----------------------------------------------------------------------|---------------------|-------|------|------|------|
|                                                                      | ACC                 | MCC   | AUC  | KL   | DD   |
| Disordered region: residues not in PDB-defined helix, sheet, or turn | 0.43                | -0.01 | 0.48 | 1.14 | 0.00 |
| Disordered region: FoldIndex [1]                                     | 0.21                | 0.02  | 0.49 | 2.23 | 0.00 |
| Helix breaker: helix is defined by DSSP [2]                          | 0.38                | -0.03 | 0.48 | 1.11 | 0.00 |
| Turn breaker: turn is defined by DSSP [2]                            | 0.58                | -0.03 | 0.48 | 0.32 | 0.00 |

\* ACC = accuracy, MCC = Matthews correlation coefficient, AUC = area under the curve, KL = Kullback-Leibler divergence, DD = distribution distance. These values were calculated from a ten-fold cross-validation of each feature.

## REFERENCES

1. Prilusky J, Felder CE, Zeev-Ben-Mordehai T, Rydberg EH, Man O, et al. (2005) FoldIndex: a simple tool to predict whether a given protein sequence is intrinsically unfolded. *Bioinformatics* 21: 3435-3438.
2. Kabsch W, Sander C (1983) Dictionary of protein secondary structure: pattern recognition of hydrogen-bonded and geometrical features. *Biopolymers* 22: 2577-2637.
