# Supplementary material for: Neighborhood Properties Are Important Determinants of Temperature Sensitive Mutations
Source: PubMed Central journal article supplement (PMC3229608; doi:10.1371/journal.pone.0028507), 2011-12-02
Supplement: pone.0028507.s005.pdf [file pone.0028507.s005.pdf]

**Table S4 - The top-five most predictive features based on AUC values in each of the six categories**

| Feature                                                                        | Feature evaluation* |      |      |      |      |
|--------------------------------------------------------------------------------|---------------------|------|------|------|------|
|                                                                                | ACC                 | MCC  | AUC  | KL   | DD   |
| <b><i>Mutation site, sequence features</i></b>                                 |                     |      |      |      |      |
| EntropySub                                                                     | 0.73                | 0.32 | 0.76 | 0.21 | 0.30 |
| RelEntropySub                                                                  | 0.70                | 0.24 | 0.73 | 0.24 | 0.18 |
| PHC                                                                            | 0.68                | 0.22 | 0.71 | 0.26 | 0.13 |
| EntropySuper                                                                   | 0.59                | 0.16 | 0.66 | 0.47 | 0.08 |
| RelEntropySuper                                                                | 0.59                | 0.16 | 0.66 | 0.48 | 0.07 |
| <b><i>Mutation site, structure features</i></b>                                |                     |      |      |      |      |
| RelSolvAccessWT                                                                | 0.61                | 0.19 | 0.71 | 0.44 | 0.12 |
| sBfactor                                                                       | 0.62                | 0.20 | 0.70 | 0.44 | 0.17 |
| snormBfactor                                                                   | 0.62                | 0.20 | 0.70 | 0.43 | 0.15 |
| SolvAccessWT                                                                   | 0.58                | 0.19 | 0.70 | 0.53 | 0.11 |
| Bfactor                                                                        | 0.57                | 0.16 | 0.69 | 0.55 | 0.13 |
| <b><i>Neighborhood defined by sequence distance, sequence features</i></b>     |                     |      |      |      |      |
| EntropySubAA                                                                   | 0.68                | 0.25 | 0.74 | 0.30 | 0.26 |
| RelEntropySubAA                                                                | 0.67                | 0.25 | 0.73 | 0.31 | 0.23 |
| AA20D                                                                          | 0.67                | 0.22 | 0.72 | 0.29 | 0.17 |
| NPCAA                                                                          | 0.63                | 0.11 | 0.61 | 0.30 | 0.04 |
| HydroAvgDiff                                                                   | 0.59                | 0.11 | 0.61 | 0.41 | 0.04 |
| <b><i>Neighborhood defined by sequence distance, structure features</i></b>    |                     |      |      |      |      |
| sBfactorAA                                                                     | 0.52                | 0.11 | 0.64 | 0.67 | 0.06 |
| snormBfactorAA                                                                 | 0.52                | 0.11 | 0.64 | 0.67 | 0.06 |
| normBfactorAA                                                                  | 0.51                | 0.10 | 0.63 | 0.71 | 0.06 |
| BfactorAA                                                                      | 0.51                | 0.10 | 0.63 | 0.72 | 0.06 |
| HydroMomentDiff                                                                | 0.69                | 0.10 | 0.59 | 0.14 | 0.03 |
| <b><i>Neighborhood defined by Euclidean distance, structure features</i></b>   |                     |      |      |      |      |
| Eucl20D                                                                        | 0.75                | 0.32 | 0.79 | 0.17 | 0.32 |
| EntropySubEucl                                                                 | 0.68                | 0.25 | 0.74 | 0.30 | 0.29 |
| RelEntropySubEucl                                                              | 0.69                | 0.26 | 0.74 | 0.27 | 0.26 |
| snormBfactorEucl                                                               | 0.52                | 0.12 | 0.68 | 0.68 | 0.11 |
| sBfactorEucl                                                                   | 0.52                | 0.12 | 0.68 | 0.68 | 0.11 |
| <b><i>Neighborhood defined by topological distance, structure features</i></b> |                     |      |      |      |      |
| DT20D                                                                          | 0.71                | 0.27 | 0.75 | 0.23 | 0.19 |
| EntropySubDT                                                                   | 0.68                | 0.26 | 0.75 | 0.31 | 0.27 |
| RelEntropySubDT                                                                | 0.68                | 0.25 | 0.75 | 0.29 | 0.26 |
| sBfactorDT                                                                     | 0.54                | 0.14 | 0.69 | 0.65 | 0.15 |
| snormBfactorDT                                                                 | 0.54                | 0.14 | 0.69 | 0.65 | 0.14 |

\* ACC = accuracy, MCC = Matthews correlation coefficient, AUC = area under the curve, KL = Kullback-Leibler divergence, DD = distribution distance. These values were calculated from a ten-fold cross-validation of each feature.
