# Supplementary material for: Neighborhood Properties Are Important Determinants of Temperature Sensitive Mutations
Source: PubMed Central journal article supplement (PMC3229608; doi:10.1371/journal.pone.0028507), 2011-12-02
Supplement: pone.0028507.s006.pdf [file pone.0028507.s006.pdf]

**Table S5 - The “site features” model**

| <b>Feature</b>   | <b>Estimate</b> |
|------------------|-----------------|
| (Intercept)      | -0.682          |
| EntropySub       | -3.412          |
| EntropySuper     | 2.084           |
| RelEntropySub    | 1.377           |
| PHC              | 0.504           |
| HydrophobMut     | -0.009          |
| HydrophobDiff    | -0.002          |
| ChargeDiff       | -0.137          |
| Unusual          | 0.020           |
| NonPolarMut      | 0.039           |
| NonPolar2Charged | 0.010           |
| Polar2Charged    | -0.905          |
| Polar2Polar      | -0.173          |
| Charged2Charged  | -0.444          |
| DisorderRegion   | 0.548           |
| SolvAccessDiff   | -0.003          |
| RelSolvAccessWT  | -2.077          |
| BuryWT           | 0.343           |
| BuryMut          | 0.311           |
| IsLigand         | -0.281          |
| HelixBreaker     | -0.750          |
| sBfactor         | -0.005          |
| snormBfactor     | -0.002          |
| ddGPoPMuSiC      | 0.167           |
| ddGratioFoldX    | 0.635           |
