# Supplementary material for: Neighborhood Properties Are Important Determinants of Temperature Sensitive Mutations
Source: PubMed Central journal article supplement (PMC3229608; doi:10.1371/journal.pone.0028507), 2011-12-02
Supplement: pone.0028507.s007.pdf [file pone.0028507.s007.pdf]

**Table S6 - The “neighborhood features” model**

| <b>Feature</b>      | <b>Estimate</b> |
|---------------------|-----------------|
| (Intercept)         | -9.486          |
| AA20D_A             | 0.041           |
| AA20D_C             | 0.149           |
| AA20D_D             | -0.130          |
| AA20D_F             | -0.002          |
| AA20D_G             | -0.101          |
| AA20D_H             | -0.125          |
| AA20D_I             | 0.140           |
| AA20D_K             | -0.004          |
| AA20D_L             | -0.150          |
| AA20D_M             | -0.001          |
| AA20D_P             | -0.339          |
| AA20D_Q             | -0.062          |
| AA20D_S             | -0.214          |
| AA20D_T             | -0.188          |
| AA20D_V             | -0.078          |
| AA20D_W             | 0.242           |
| AA20D_Y             | 0.008           |
| RelEntropySubAA     | 2.672           |
| RelEntropySuperAA   | -1.400          |
| HydroAvgWT          | -0.003          |
| HydroAvgDiff        | 0.057           |
| PolarAA             | -0.015          |
| NonpolarAA          | -0.051          |
| ChargedAA           | -0.021          |
| NegAA               | 0.070           |
| AA2Ligand           | -0.032          |
| AA2FTLigand         | 0.039           |
| HydroMomentMut      | -0.005          |
| HydroMomentDiff     | -0.005          |
| SolvAccessAA        | -0.006          |
| RelSolvAccessAA     | 1.995           |
| sBfactorAA          | 0.013           |
| snormBfactorAA      | 0.013           |
| Eucl20D_ALA         | 0.086           |
| Eucl20D_ARG         | 0.023           |
| Eucl20D_ASN         | -0.142          |
| Eucl20D_ASP         | 0.054           |
| Eucl20D_CYS         | -0.169          |
| Eucl20D_GLN         | 0.050           |
| Eucl20D_GLU         | -0.123          |
| Eucl20D_GLY         | 0.114           |
| Eucl20D_ILE         | 0.218           |
| Eucl20D_LEU         | -0.205          |
| Eucl20D_LYS         | 0.113           |
| Eucl20D_MET         | 0.237           |
| Eucl20D_PHE         | 0.091           |
| Eucl20D_PRO         | 0.124           |
| Eucl20D_THR         | 0.360           |
| Eucl20D_TRP         | -0.307          |
| Eucl20D_TYR         | -0.154          |
| Eucl20D_VAL         | -0.057          |
| RelEntropySubEucl   | 4.342           |
| RelEntropySuperEucl | -1.481          |
| HydroAvgEucl        | -0.008          |
| HydroWToverAvgEucl  | 0.573           |
| HydroMutoverAvgEucl | -3.332          |

|                    |        |
|--------------------|--------|
| PosEucl            | 0.094  |
| SolvAccessEucl     | -0.013 |
| RelSolvAccessEucl  | 8.019  |
| BfactorEucl        | 0.005  |
| Eucl2FT            | 0.050  |
| Eucl2Ligand        | -0.035 |
| Eucl2FTLigand      | 0.020  |
| Hbond_6A           | -0.043 |
| SaltBridge_6A      | 0.120  |
| Hbond_2layers      | 0.007  |
| SaltBridge_2layers | -0.256 |
| DT20D_A            | -0.069 |
| DT20D_C            | -0.843 |
| DT20D_D            | 0.192  |
| DT20D_F            | -0.061 |
| DT20D_G            | 0.043  |
| DT20D_H            | -0.005 |
| DT20D_I            | 0.083  |
| DT20D_K            | 0.421  |
| DT20D_L            | -0.070 |
| DT20D_M            | -0.060 |
| DT20D_N            | -0.149 |
| DT20D_P            | 0.191  |
| DT20D_Q            | 0.318  |
| DT20D_R            | 0.140  |
| DT20D_S            | 0.147  |
| DT20D_T            | 0.065  |
| DT20D_V            | -0.295 |
| DT20D_Y            | -0.005 |
| EntropySuperDT     | -5.188 |
| RelEntropySubDT    | 2.862  |
| RelEntropySuperDT  | -8.278 |
| HydroAvgDT         | 0.147  |
| HydroMutoverAvgDT  | 2.195  |
| NonPolarDT         | -0.029 |
| ChargedDT          | 0.226  |
| SolvAccessDT       | -0.058 |
| RelSolvAccessDT    | 6.982  |
| BfactorDT          | 0.004  |
| DTcountType0       | 0.073  |
| DTcountType1       | 0.120  |
| DTcountType2       | 0.148  |
| DTcountType3       | -0.006 |

---
