# Supplementary material for: Neighborhood Properties Are Important Determinants of Temperature Sensitive Mutations
Source: PubMed Central journal article supplement (PMC3229608; doi:10.1371/journal.pone.0028507), 2011-12-02
Supplement: pone.0028507.s008.pdf [file pone.0028507.s008.pdf]

**Table S7 - The “sequence neighborhood” model**

| <b>Feature</b>    | <b>Estimate</b> |
|-------------------|-----------------|
| (Intercept)       | -1.578          |
| AA20D_A           | 0.003           |
| AA20D_C           | 0.027           |
| AA20D_E           | -0.225          |
| AA20D_F           | -0.048          |
| AA20D_G           | 0.162           |
| AA20D_H           | -0.226          |
| AA20D_I           | 0.088           |
| AA20D_L           | -0.356          |
| AA20D_M           | 0.003           |
| AA20D_P           | -0.088          |
| AA20D_S           | -0.063          |
| AA20D_V           | -0.235          |
| AA20D_W           | -0.432          |
| EntropySubAA      | -2.836          |
| RelEntropySubAA   | 4.244           |
| RelEntropySuperAA | -4.973          |
| HydroAvgWT        | 0.025           |
| HydroAvgDiff      | -0.046          |
| PolarAA           | -0.013          |
| AA2FT             | 0.007           |
| AA2FTLigand       | 0.001           |
| HydroMomentDiff   | -0.010          |
| RelSolvAccessAA   | 3.181           |
