# Supplementary material for: Neighborhood Properties Are Important Determinants of Temperature Sensitive Mutations
Source: PubMed Central journal article supplement (PMC3229608; doi:10.1371/journal.pone.0028507), 2011-12-02
Supplement: pone.0028507.s009.pdf [file pone.0028507.s009.pdf]

**Table S8 - The “Euclidean neighborhood” model**

| <b>Feature</b>      | <b>Estimate</b> |
|---------------------|-----------------|
| (Intercept)         | -1.320          |
| Eucl20D_ALA         | 0.085           |
| Eucl20D_ARG         | 0.037           |
| Eucl20D_ASP         | 0.203           |
| Eucl20D_CYS         | -0.228          |
| Eucl20D_GLN         | 0.195           |
| Eucl20D_GLY         | 0.158           |
| Eucl20D_ILE         | 0.282           |
| Eucl20D_LEU         | -0.244          |
| Eucl20D_LYS         | 0.254           |
| Eucl20D_MET         | 0.217           |
| Eucl20D_PHE         | 0.205           |
| Eucl20D_PRO         | 0.215           |
| Eucl20D_SER         | 0.070           |
| Eucl20D_THR         | 0.331           |
| Eucl20D_TRP         | -0.045          |
| Eucl20D_TYR         | -0.102          |
| Eucl20D_VAL         | -0.092          |
| EntropySubEucl      | 6.271           |
| EntropySuperEucl    | -20.377         |
| RelEntropySubEucl   | 14.979          |
| RelEntropySuperEucl | -25.650         |
| HydroAvgEucl        | 0.130           |
| HydroWToverAvgEucl  | 0.518           |
| HydroMutoverAvgEucl | -0.729          |
| PolarEucl           | 0.009           |
| ChargedEucl         | 0.043           |
| PosEucl             | 0.191           |
| RelSolvAccessEucl   | 5.803           |
| BfactorEucl         | 0.032           |
| normBfactorEucl     | 0.002           |
| sBfactorEucl        | -0.012          |
| snormBfactorEucl    | -0.075          |
| Eucl2FT             | 0.053           |
| Eucl2Ligand         | -0.070          |
| Eucl2FTLigand       | 0.073           |
| Hbond_6A            | -0.028          |
| SaltBridge_6A       | 0.226           |
| SaltBridge_2layers  | -0.569          |
