# Supplementary material for: Neighborhood Properties Are Important Determinants of Temperature Sensitive Mutations
Source: PubMed Central journal article supplement (PMC3229608; doi:10.1371/journal.pone.0028507), 2011-12-02
Supplement: pone.0028507.s010.pdf [file pone.0028507.s010.pdf]

**Table S9 - The “topological neighborhood” model**

| <b>Feature</b>    | <b>Estimate</b> |
|-------------------|-----------------|
| (Intercept)       | 1.808           |
| DT20D_C           | -0.550          |
| DT20D_D           | 0.048           |
| DT20D_F           | 0.223           |
| DT20D_H           | -0.153          |
| DT20D_I           | 0.164           |
| DT20D_K           | 0.590           |
| DT20D_L           | -0.199          |
| DT20D_M           | 0.156           |
| DT20D_N           | -0.163          |
| DT20D_P           | 0.192           |
| DT20D_Q           | 0.348           |
| DT20D_S           | -0.010          |
| DT20D_T           | 0.185           |
| DT20D_V           | -0.273          |
| DT20D_W           | 0.110           |
| DT20D_Y           | -0.146          |
| DTcontact         | 0.003           |
| EntropySubDT      | -8.289          |
| EntropySuperDT    | -2.316          |
| RelEntropySuperDT | -6.448          |
| HydroAvgDT        | 0.086           |
| HydroWToverAvgDT  | 0.138           |
| HydroMutoverAvgDT | -0.594          |
| ChargedDT         | 0.173           |
| SolvAccessDT      | -0.043          |
| RelSolvAccessDT   | 5.938           |
| BfactorDT         | 0.005           |
| DTcount           | 0.026           |
| DTcountType0      | 0.027           |
| DTcountType1      | 0.109           |
| DTcountType2      | 0.034           |
| DTcountType4      | -0.087          |
