# Supplementary material for: Neighborhood Properties Are Important Determinants of Temperature Sensitive Mutations
Source: PubMed Central journal article supplement (PMC3229608; doi:10.1371/journal.pone.0028507), 2011-12-02
Supplement: pone.0028507.s011.pdf [file pone.0028507.s011.pdf]

**Table S10 - The “all features” model**

| <b>Feature</b>   | <b>Estimate</b> |
|------------------|-----------------|
| (Intercept)      | -3.840          |
| EntropySub       | -0.813          |
| EntropySuper     | 0.416           |
| RelEntropySub    | 1.127           |
| PHC              | 0.552           |
| VolumeDiff       | 0.003           |
| ChargeDiff       | -0.145          |
| Grantham         | 0.002           |
| Unusual          | 0.417           |
| NonPolarMut      | 0.197           |
| NonPolar2Polar   | -0.002          |
| Polar2Charged    | -1.039          |
| Polar2Polar      | 0.004           |
| Charged2Charged  | -0.542          |
| DisorderRegion   | 2.146           |
| SolvAccessWT     | 0.008           |
| SolvAccessDiff   | -0.002          |
| RelSolvAccessWT  | -4.113          |
| RelSolvAccessMut | -0.064          |
| BuryWT           | 1.057           |
| BuryMut          | 0.488           |
| IsLigand         | 0.165           |
| InStruct         | 0.448           |
| HelixBreaker     | -0.851          |
| ddGPoPMuSiC      | 0.215           |
| ddGratioFoldX    | 0.836           |
| AA20D_A          | 0.019           |
| AA20D_C          | 0.062           |
| AA20D_D          | -0.040          |
| AA20D_F          | 0.059           |
| AA20D_G          | 0.012           |
| AA20D_H          | -0.166          |
| AA20D_L          | -0.350          |
| AA20D_M          | -0.042          |
| AA20D_P          | -0.130          |
| AA20D_Q          | -0.069          |
| AA20D_S          | -0.135          |
| AA20D_T          | -0.249          |
| AA20D_V          | -0.170          |
| RelEntropySubAA  | 0.806           |
| PolarAA          | -0.094          |
| NonpolarAA       | -0.134          |
| ChargedAA        | -0.068          |
| NegAA            | 0.231           |
| AA2FTLigand      | 0.013           |
| HydroMomentMut   | -0.002          |
| HydroMomentDiff  | -0.004          |
| SolvAccessAA     | -0.013          |
| sBfactorAA       | 0.009           |
| snormBfactorAA   | 0.002           |
| Eucl20D_ALA      | 0.120           |
| Eucl20D_ASN      | -0.082          |
| Eucl20D_ASP      | 0.004           |
| Eucl20D_CYS      | -0.134          |
| Eucl20D_GLU      | -0.070          |
| Eucl20D_GLY      | 0.047           |
| Eucl20D_ILE      | 0.193           |

|                     |        |
|---------------------|--------|
| Eucl20D_LEU         | -0.150 |
| Eucl20D_LYS         | 0.057  |
| Eucl20D_MET         | 0.147  |
| Eucl20D_PRO         | 0.097  |
| Eucl20D_SER         | -0.020 |
| Eucl20D_THR         | 0.264  |
| Eucl20D_TRP         | -0.331 |
| Eucl20D_TYR         | -0.148 |
| Eucl20D_VAL         | -0.023 |
| RelEntropySubEucl   | 7.362  |
| RelEntropySuperEucl | -2.927 |
| HydroMutoverAvgEucl | -0.887 |
| PosEucl             | 0.039  |
| RelSolvAccessEucl   | 1.363  |
| BfactorEucl         | 0.007  |
| Eucl2FT             | 0.028  |
| Eucl2Ligand         | -0.003 |
| Eucl2FTLigand       | 0.005  |
| Hbond_6A            | -0.039 |
| SaltBridge_6A       | 0.185  |
| Hbond_2layers       | -0.010 |
| SaltBridge_2layers  | -0.510 |
| DT20D_A             | 0.010  |
| DT20D_C             | -0.461 |
| DT20D_D             | 0.207  |
| DT20D_E             | -0.040 |
| DT20D_I             | 0.215  |
| DT20D_K             | 0.081  |
| DT20D_L             | 0.019  |
| DT20D_N             | -0.261 |
| DT20D_Q             | -0.024 |
| DT20D_S             | 0.031  |
| DT20D_T             | 0.008  |
| DT20D_V             | -0.186 |
| DT20D_W             | -0.109 |
| DT20D_Y             | -0.079 |
| RelEntropySuperDT   | -2.974 |
| HydroAvgDT          | 0.016  |
| RelSolvAccessDT     | 0.439  |
| DTcountType0        | 0.043  |
| DTcountType2        | 0.062  |
| DTcountType3        | -0.066 |

---
