# Supplementary material for: Neighborhood Properties Are Important Determinants of Temperature Sensitive Mutations
Source: PubMed Central journal article supplement (PMC3229608; doi:10.1371/journal.pone.0028507), 2011-12-02
Supplement: pone.0028507.s012.pdf [file pone.0028507.s012.pdf]

**Table S11 - The “sequence features” model**

| <b>Feature</b>    | <b>Estimate</b> |
|-------------------|-----------------|
| (Intercept)       | -1.042          |
| EntropySub        | -1.315          |
| RelEntropySub     | 0.902           |
| PHC               | 0.661           |
| HydrophobMut      | -0.010          |
| HydrophobDiff     | -0.005          |
| ChargeDiff        | -0.153          |
| NonPolarWT        | 0.174           |
| NonPolarMut       | 0.176           |
| NonPolar2Charged  | 0.284           |
| Polar2Charged     | -0.613          |
| Polar2Polar       | -0.101          |
| Charged2Charged   | -0.205          |
| DisorderRegion    | 1.560           |
| AA20D_A           | 0.059           |
| AA20D_E           | -0.123          |
| AA20D_G           | 0.103           |
| AA20D_H           | -0.371          |
| AA20D_K           | 0.049           |
| AA20D_L           | -0.434          |
| AA20D_M           | -0.035          |
| AA20D_S           | -0.109          |
| AA20D_T           | -0.027          |
| AA20D_V           | -0.297          |
| AA20D_W           | -0.529          |
| AA20D_Y           | -0.036          |
| EntropySubAA      | -5.404          |
| EntropySuperAA    | 5.262           |
| RelEntropySubAA   | 0.106           |
| RelEntropySuperAA | -0.246          |
| HydroAvgWT        | 0.012           |
| HydroAvgDiff      | 0.000           |
| PolarAA           | -0.017          |
| NonpolarAA        | -0.030          |
| NegAA             | 0.146           |
