# Supplementary material for: Neighborhood Properties Are Important Determinants of Temperature Sensitive Mutations
Source: PubMed Central journal article supplement (PMC3229608; doi:10.1371/journal.pone.0028507), 2011-12-02
Supplement: pone.0028507.s013.pdf [file pone.0028507.s013.pdf]

**Table S12 - The “structure features” model**

| <b>Feature</b>      | <b>Estimate</b> |
|---------------------|-----------------|
| (Intercept)         | -3.952          |
| SolvAccessWT        | 0.008           |
| SolvAccessMut       | 0.004           |
| RelSolvAccessWT     | -4.968          |
| RelSolvAccessMut    | -0.675          |
| BuryWT              | 1.131           |
| BuryMut             | 0.301           |
| IsLigand            | 0.318           |
| InStruct            | 1.492           |
| HelixBreaker        | -1.198          |
| Bfactor             | 0.090           |
| sBfactor            | -0.058          |
| snormBfactor        | -0.008          |
| ddGPoPMuSiC         | 0.384           |
| ddGratioFoldX       | 1.362           |
| AA2FT               | 0.002           |
| AA2Ligand           | -0.033          |
| AA2FTLigand         | 0.050           |
| HydroMomentMut      | -0.006          |
| HydroMomentDiff     | -0.002          |
| SolvAccessAA        | 0.012           |
| RelSolvAccessAA     | -2.700          |
| sBfactorAA          | 0.005           |
| snormBfactorAA      | 0.019           |
| Eucl20D_ALA         | 0.133           |
| Eucl20D_ASN         | -0.067          |
| Eucl20D_ASP         | 0.033           |
| Eucl20D_CYS         | -0.058          |
| Eucl20D_GLN         | 0.041           |
| Eucl20D_GLU         | -0.070          |
| Eucl20D_GLY         | 0.144           |
| Eucl20D_HIS         | 0.082           |
| Eucl20D_ILE         | 0.202           |
| Eucl20D_LEU         | -0.249          |
| Eucl20D_LYS         | 0.108           |
| Eucl20D_MET         | 0.195           |
| Eucl20D_PHE         | 0.099           |
| Eucl20D_PRO         | 0.075           |
| Eucl20D_SER         | -0.036          |
| Eucl20D_THR         | 0.319           |
| Eucl20D_TRP         | -0.188          |
| Eucl20D_TYR         | -0.265          |
| Eucl20D_VAL         | -0.071          |
| EntropySubEucl      | 13.860          |
| EntropySuperEucl    | -22.087         |
| RelEntropySubEucl   | 22.839          |
| RelEntropySuperEucl | -25.571         |
| HydroAvgEucl        | 0.030           |
| HydroWToverAvgEucl  | 1.570           |
| HydroMutoverAvgEucl | -2.907          |
| PosEucl             | 0.123           |
| SolvAccessEucl      | 0.021           |
| RelSolvAccessEucl   | -3.037          |
| BfactorEucl         | 0.122           |
| normBfactorEucl     | 0.001           |
| sBfactorEucl        | -0.065          |
| snormBfactorEucl    | -0.029          |

|                    |        |
|--------------------|--------|
| Eucl2FT            | 0.050  |
| Eucl2Ligand        | -0.066 |
| Eucl2FTLigand      | 0.071  |
| Hbond_6A           | -0.006 |
| SaltBridge_6A      | 0.180  |
| Hbond_2layers      | -0.007 |
| SaltBridge_2layers | -0.643 |
| DT20D_A            | -0.047 |
| DT20D_C            | -0.859 |
| DT20D_D            | 0.181  |
| DT20D_F            | -0.001 |
| DT20D_G            | 0.089  |
| DT20D_H            | -0.276 |
| DT20D_I            | 0.151  |
| DT20D_K            | 0.463  |
| DT20D_L            | -0.084 |
| DT20D_M            | -0.056 |
| DT20D_N            | -0.120 |
| DT20D_P            | 0.104  |
| DT20D_Q            | 0.148  |
| DT20D_S            | 0.197  |
| DT20D_T            | 0.013  |
| DT20D_V            | -0.360 |
| DT20D_W            | 0.030  |
| DT20D_Y            | 0.095  |
| EntropySubDT       | -0.174 |
| EntropySuperDT     | -3.959 |
| RelEntropySubDT    | 2.254  |
| RelEntropySuperDT  | -6.224 |
| HydroAvgDT         | 0.111  |
| HydroWToverAvgDT   | -1.747 |
| HydroMutoverAvgDT  | 2.459  |
| ChargedDT          | 0.149  |
| NegDT              | -0.082 |
| SolvAccessDT       | -0.018 |
| RelSolvAccessDT    | 8.095  |
| sBfactorDT         | -0.063 |
| snormBfactorDT     | -0.008 |
| DTcountType1       | 0.037  |
| DTcountType2       | 0.105  |
| DTcountType3       | -0.116 |
| DTcountType4       | -0.118 |

---
