# Supplementary material for: Neighborhood Properties Are Important Determinants of Temperature Sensitive Mutations
Source: PubMed Central journal article supplement (PMC3229608; doi:10.1371/journal.pone.0028507), 2011-12-02
Supplement: pone.0028507.s014.pdf [file pone.0028507.s014.pdf]

**Table S13 - Performance of TS prediction models from a ten-fold cross-validation**

| Model                    | Model evaluation* |      |      |      |      |
|--------------------------|-------------------|------|------|------|------|
|                          | ACC               | MCC  | AUC  | KL   | DD   |
| Site features            | 0.77              | 0.38 | 0.85 | 0.17 | 0.45 |
| Neighborhood features    | 0.83              | 0.47 | 0.88 | 0.08 | 0.68 |
| Sequence neighborhood    | 0.79              | 0.37 | 0.82 | 0.11 | 0.49 |
| Euclidean neighborhood   | 0.81              | 0.42 | 0.87 | 0.10 | 0.58 |
| Topological neighborhood | 0.79              | 0.40 | 0.85 | 0.13 | 0.53 |
| All features             | 0.84              | 0.51 | 0.91 | 0.08 | 0.78 |
| Sequence features        | 0.80              | 0.43 | 0.87 | 0.11 | 0.63 |
| Structure features       | 0.83              | 0.48 | 0.90 | 0.08 | 0.73 |

\* ACC = accuracy, MCC = Matthews correlation coefficient, AUC = area under the curve, KL = Kullback-Leibler divergence, DD = distribution distance.
